# Supplementary material for: The Wilms’ tumor gene (WT1) regulates E-cadherin expression and migration of prostate cancer cells
Source: PubMed Central journal article supplement (PMC3568020; doi:10.1186/1476-4598-12-3), 2013-01-08
Supplement: 1476-4598-12-3-S1.pdf [file 1476-4598-12-3-S1.pdf]

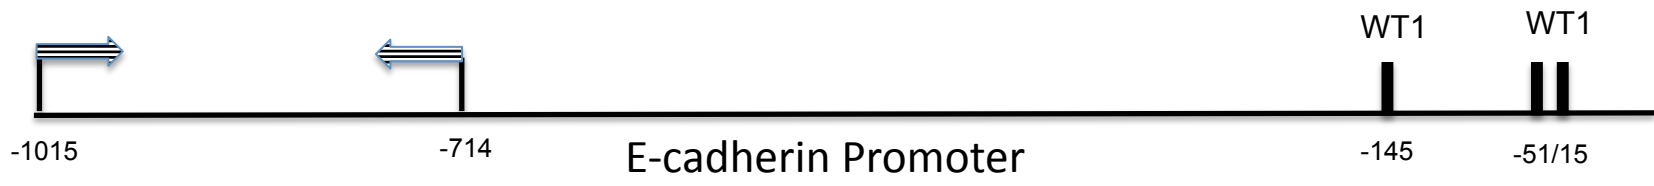

**PC3**

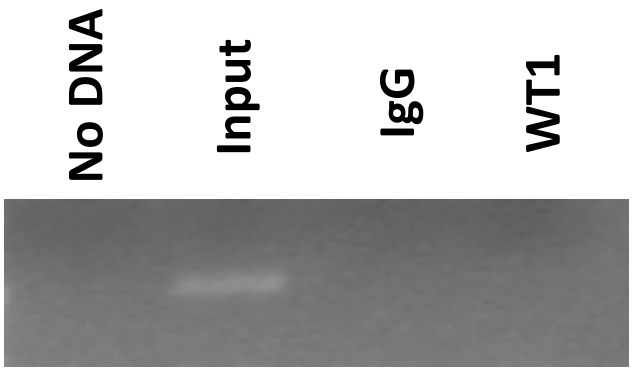

**LNCaP**

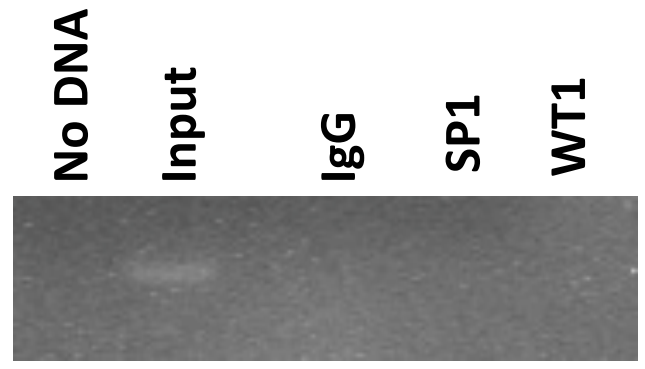

Supplemental Figure 1
